# Supplementary material
Source: PubMed Central journal article supplement (PMC3717223)
Supplement: tjp0591-3197-SD1.pdf [file tjp0591-3197-SD1.pdf]

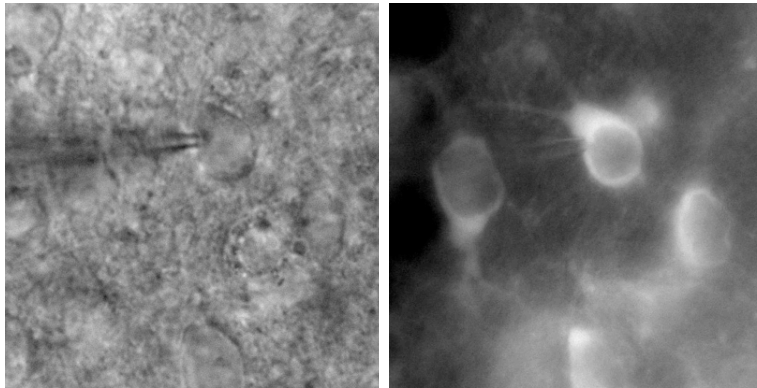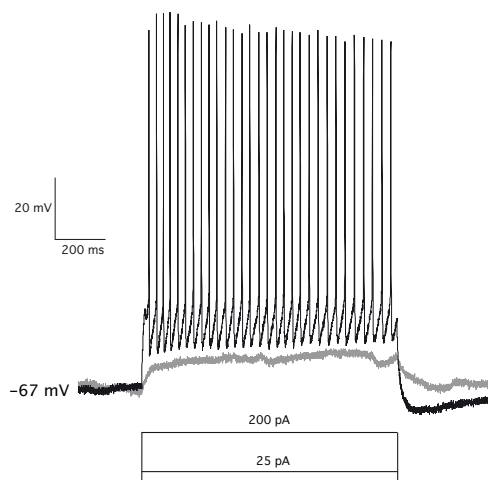

### **Supplementary figure 1: Neurons expressing the biosensor exhibit normal electrophysiological properties**

A neuron infected by the sindbis vector for Epac1-camps was patch-clamped with a potassium methane sulfonate pipette solution. Top left: the neuron imaged in transmitted infra-red light. Top right: the same field showing the fluorescence of the biosensor. Traces below show the voltage responses to current injection in current-clamp mode (25 pA and 200 pA) in the same neuron. The input resistances was monitored in voltage-clamp mode and was  $R_{in}=437 \text{ M}\Omega \pm 62 \text{ M}\Omega$ ,  $n=4$  for transfected cells and  $R_{in}=350 \text{ M}\Omega$   $n=1$  for a non-transfected cell.

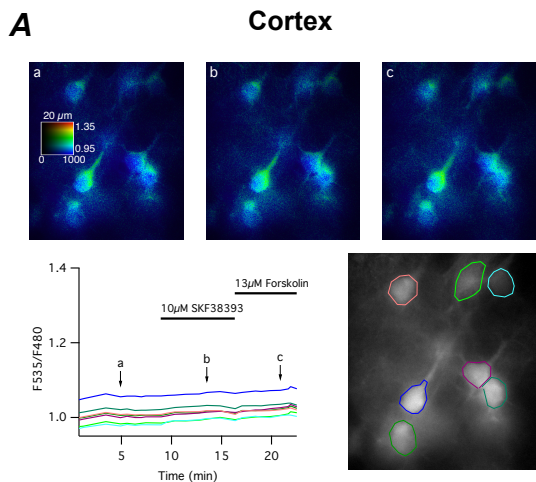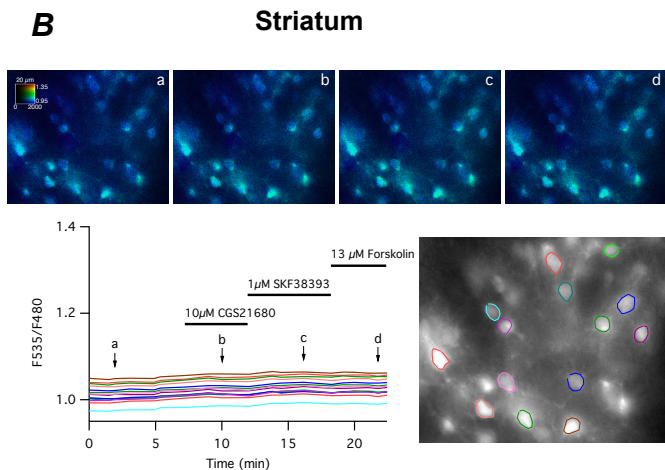

**Supplementary figure 2: No response was detected when the phosphorylation site in AKAR3 was mutated.**

The threonine 391 residue, which is phosphorylated by PKA, was replaced with an alanine residue. When this mutant biosensor was expressed in cortical (**A**) or striatal (**B**) neurones. No response to SKF38393, CGS21680 or forskolin was detected by wide-field imaging.

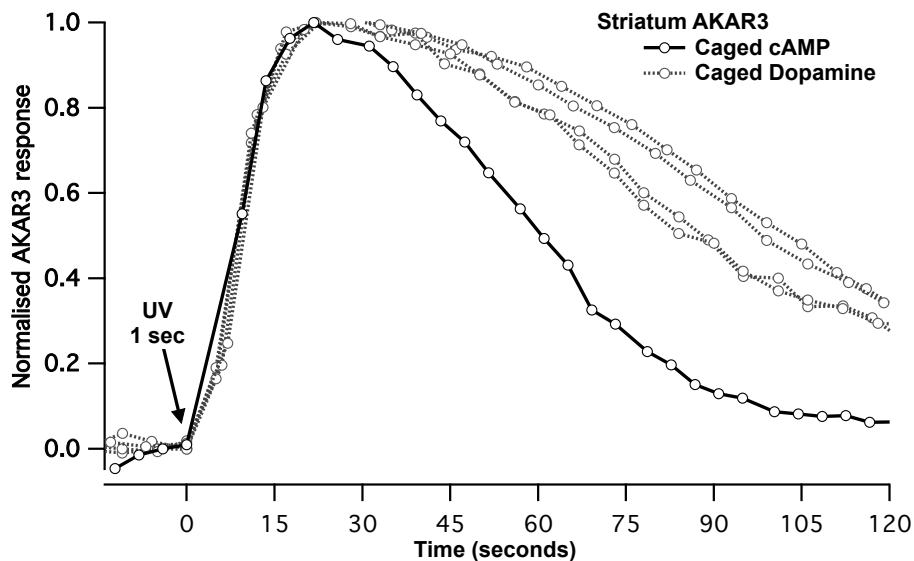

### Supplementary figure 3: Temporal resolution of AKAR3 measurements

The experiment was performed using the same experimental conditions as Fig. 8. NPEC-Dopamine (caged dopamine) was applied in the bath at 5  $\mu\text{M}$  concentration. DMNB-cAMP (caged cAMP) was applied in the bath at 10  $\mu\text{M}$  concentration. Sampling rate was 0.2 Hz.

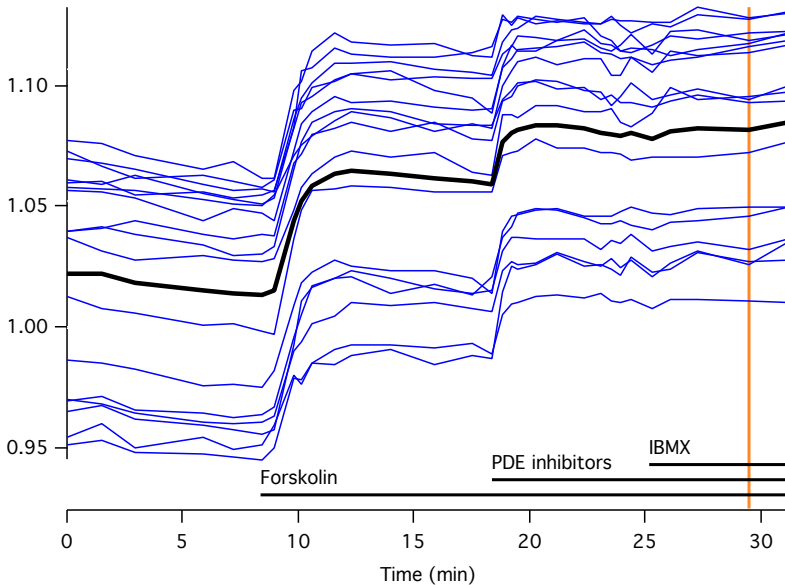

**Supplementary figure 4: the effect of IBMX does not involve a non-specific inhibition of adenosine receptors**

We inhibited PDE1 and PDE5 (zaprinast, 50  $\mu$ M), PDE2 (EHNA, 100 nM) PDE3 (Cilostamide, 1 $\mu$ M) PDE4 (rolipram, 100nM), PDE7 (Br150481, 1 $\mu$ M) and PDE10 (PQ10, 100nM). Addition of this cocktail of PDE inhibitors to forskolin induced a strong increase in the cAMP levels (n=5). Addition of IBMX did not produce any further increase.



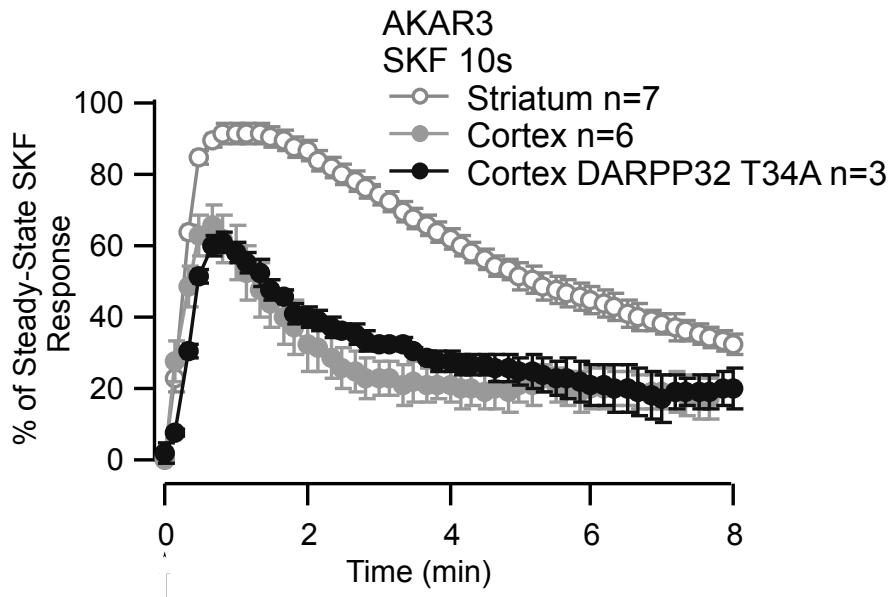

**Supplementary Figure 5: In the cortex, the T34A mutation in DARPP-32 does not affect the kinetics of the response to transient SKF38393 stimulation.**

The experiment was performed using the same experimental conditions as Fig. 7.
